# Supplementary material for: Purification, Visualization, and Molecular Signature of Neural Stem Cells
Source: PubMed Central journal article supplement — Stem Cells Dev. 2015 Oct 14;25(2):189–201. doi: 10.1089/scd.2015.0190 (PMC4770853; doi:10.1089/scd.2015.0190), 2015-10-14
Supplement: Supp_Figure3.pdf [file Supp_Figure3.pdf]

Log<sub>2</sub> expression relative to actin

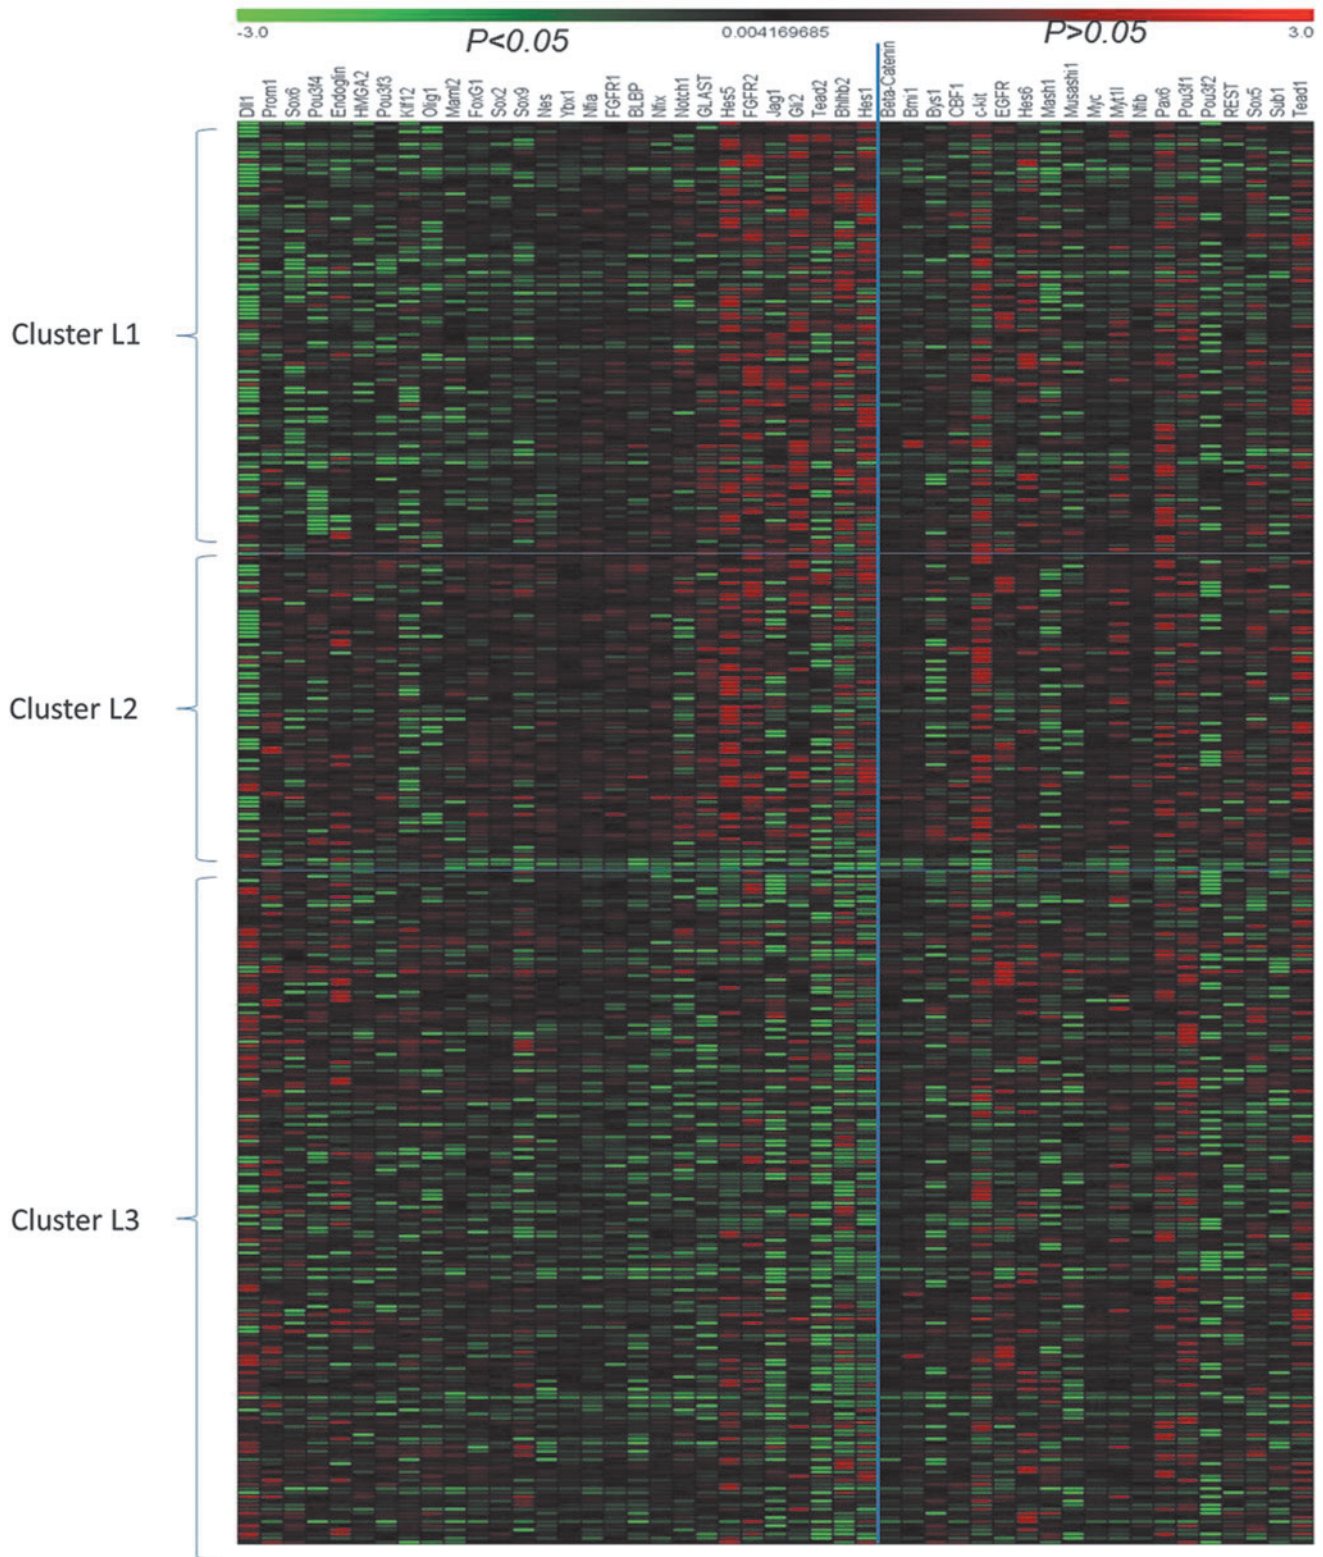

**SUPPLEMENTARY FIG. S3.** Heatmap showing the mRNA profile of clusters L1, L2, and L3. Heatmap showing the mRNA profile of the different clusters. Each row represents one cell and each column represents one gene. Genes under the  $P < 0.05$  section are genes that show a statistically significant change in expression in cluster L1 compared with clusters L2 and L3 combined. Red and green colors represent high and low expression, respectively.
