# Supplementary material for: Purification, Visualization, and Molecular Signature of Neural Stem Cells
Source: PubMed Central journal article supplement — Stem Cells Dev. 2015 Oct 14;25(2):189–201. doi: 10.1089/scd.2015.0190 (PMC4770853; doi:10.1089/scd.2015.0190), 2015-10-14
Supplement: Supp_Table1.pdf [file Supp_Table1.pdf]

SUPPLEMENTARY TABLE S1. SINGLE-CELL MESSENGER RNA (mRNA) PROFILING ASSAY INFORMATION

| <i>Gene abbreviation</i> | <i>Full gene name</i>                                                  | <i>NCBI accession number</i> | <i>Intron spanning</i> | <i>Taqman assay ID</i> |
|--------------------------|------------------------------------------------------------------------|------------------------------|------------------------|------------------------|
| <i>Sox5</i>              | SRY-box containing gene5                                               | NM_011444.2                  | No                     | Mm00488381_m1          |
| <i>Sox6</i>              | SRY-box containing gene6                                               | NM_001025559.2               | No                     | Mm00488393_m1          |
| <i>Sox9</i>              | SRY-box containing gene9                                               | NM_011448.4                  | No                     | Mm00448840_m1          |
| <i>Hes1</i>              | Hairy and enhancer of split1                                           | NM_008235.2                  | No                     | Mm01342805_m1          |
| <i>Hes5</i>              | Hairy and enhancer of split5                                           | NM_010419.4                  | No                     | Mm00439311_g1          |
| <i>Hes6</i>              | Hairy and enhancer of split6                                           | NM_019479.3                  | No                     | Mm00517097_g1          |
| <i>Notch1</i>            | Notch gene homolog1                                                    | NM_008714.3                  | No                     | Mm00435249_m1          |
| <i>Jag1</i>              | Jagged1                                                                | NM_013822.5                  | No                     | Mm00496902_m1          |
| <i>Mash 1 (Ascl1)</i>    | Achaete-scute complex homolog 1                                        | NM_008553.4                  | No                     | Mm03058063_m1          |
| <i>Dll3</i>              | Delta-like3                                                            | NM_007866.2                  | No                     | Mm00432854_m1          |
| <i>CBF1</i>              | Recombination signal-binding protein for immunoglobulin kappa J region | NM_009035.4                  | No                     | Mm00770450_m1          |
| <i>Pou3f1</i>            | POU domain, class 3, transcription factor 1                            | NM_011141.2                  | No                     | Mm00843534_s1          |
| <i>Pou3f2</i>            | POU domain, class 3, transcription factor 2                            | NM_008899.1                  | No                     | Mm00843777_s1          |
| <i>Pou3f3</i>            | POU domain, class 3, transcription factor 3                            | NM_008900.2                  | No                     | Mm00843792_s1          |
| <i>Pou3f4</i>            | POU domain, class 3, transcription factor 4                            | NM_008901.1                  | No                     | Mm00447171_s1          |
| <i>β-catenin</i>         | Cadherin-associated protein, beta1                                     | NM_001165902.1               | No                     | Mm01350394_m1          |
| <i>Olig1</i>             | Oligodendrocyte transcription factor1                                  | NM_016968.4                  | No                     | Mm00497537_s1          |
| <i>Myt1L</i>             | Myelin transcription factor 1-like                                     | NM_001093775                 | No                     | Mm00485408_m1          |
| <i>BHLHB2</i>            | Basic helix-loop-helix family, member e40                              | NM_016967.2                  | No                     | Mm00478593_m1          |
| <i>FGFR1</i>             | Fibroblast growth factor receptor1                                     | NM_001079908.1               | No                     | Mm01215485_g1          |
| <i>FGFR2</i>             | Fibroblast growth factor receptor 2                                    | NM_010207.2                  | No                     | Mm00438941_m1          |
| <i>EGFR</i>              | Epidermal growth factor receptor                                       | NM_007912.4                  | No                     | Mm01187858_m1          |
| <i>GLAST</i>             | Glutamate aspartate transporter                                        | NM_148938.3                  | No                     | Mm00600697_m1          |
| <i>BLBP</i>              | Brain lipid-binding protein                                            | NM_021272.3                  | No                     | Mm00445225_m1          |
| <i>Prom1</i>             | Prominin1                                                              | NM_001163577.1               | No                     | Mm00477115_m1          |
| <i>Bysl</i>              | Bystin-like                                                            | NM_016859.3                  | No                     | Mm00479473_m1          |
| <i>Msi1</i>              | Musash1                                                                | NM_008629.1                  | No                     | Mm00485224_m1          |
| <i>c-kit</i>             | c-kit oncogene                                                         | NM_001122733.1               | No                     | Mm00445212_m1          |
| <i>Eng</i>               | Endoglin                                                               | NM_001146348.1               | No                     | Mm03023983_m1          |
| <i>Nes</i>               | Nestin                                                                 | NM_016701.3                  | No                     | Mm00450205_m1          |
| <i>Sox2</i>              | SRY-box containing gene2                                               | NM_011443.3                  | No                     | Mm03053810_s1          |
| <i>Gli2</i>              | GLI-Kruppel family member2                                             | NM_001081125.1               | No                     | Mm01293117_m1          |
| <i>Pax6</i>              | Paired box gene6                                                       | NM_013627.4                  | No                     | Mm00443081_m1          |
| <i>Myc</i>               | Myelocytomatosis oncogene                                              | NM_001177352.1               | No                     | Mm00487804_m1          |
| <i>Bmi1</i>              | Bmi1 polycomb ring finger oncogene                                     | NM_007552.4                  | No                     | Mm00776122_gH          |
| <i>REST</i>              | RE1-silencing transcription factor                                     | NM_011263.2                  | No                     | Mm00803268_m1          |
| <i>FoxG1</i>             | Forkhead box G1                                                        | NM_001160112.1               | No                     | Mm02059886_s1          |
| <i>Nfia</i>              | Nuclear factor I/A                                                     | NM_001122952.1               | No                     | Mm00447981_m1          |
| <i>Nfib</i>              | Nuclear factor I/B                                                     | NM_001113209.1               | No                     | Mm00500784_m1          |
| <i>Nfix</i>              | Nuclear factor I/X                                                     | NM_001081982.1               | No                     | Mm00477796_m1          |
| <i>Maml2</i>             | Mastermind-like2                                                       | NM_001013813.3               | No                     | Mm00620617_m1          |
| <i>Klf12</i>             | Kruppel-like factor12                                                  | NM_010636.3                  | No                     | Mm00516098_m1          |
| <i>Tead1</i>             | TEA domain family member1                                              | NM_001166584.1               | No                     | Mm00493503_m1          |
| <i>Tead2</i>             | TEA domain family member 2                                             | NM_011565.2                  | No                     | Mm00449004_m1          |
| <i>Ybx1</i>              | Y-box protein 1                                                        | NM_011732.2                  | No                     | Mm00850878_g1          |
| <i>Sub1</i>              | SUB1 homolog                                                           | NM_011294.3                  | No                     | Mm00726782_s1          |
| <i>HMGA2</i>             | High mobility group AT-hook 2                                          | NM_010441.2                  | No                     | Mm00780304_sH          |
| <i>B-actin</i>           | Beta-actin                                                             | NM_007393.3                  | No                     | Mm01205647_g1          |
